# Supplementary material
Source: PubMed Central journal article supplement (PMC6708353)
Supplement: pnas.1907042116.sapp.pdf [file pnas.1907042116.sapp.pdf]

## Supplementary Information for

### A small number of cholinergic neurons mediate hyper-aggression in female *Drosophila*

Caroline B. Palavicino-Maggio<sup>1\*</sup>, Yick-Bun Chan<sup>1</sup>, Claire McKellar<sup>2</sup> and Edward A. Kravitz<sup>1\*</sup>

Corresponding authors\*

[caroline\\_palavicino-maggio@hms.harvard.edu](mailto:caroline_palavicino-maggio@hms.harvard.edu)

[edward\\_kravitz@hms.harvard.edu](mailto:edward_kravitz@hms.harvard.edu)

#### **This PDF file includes:**

Figs. S1 to S9

Captions for Movies S1 to S7

List of detailed genotypes and sample sizes

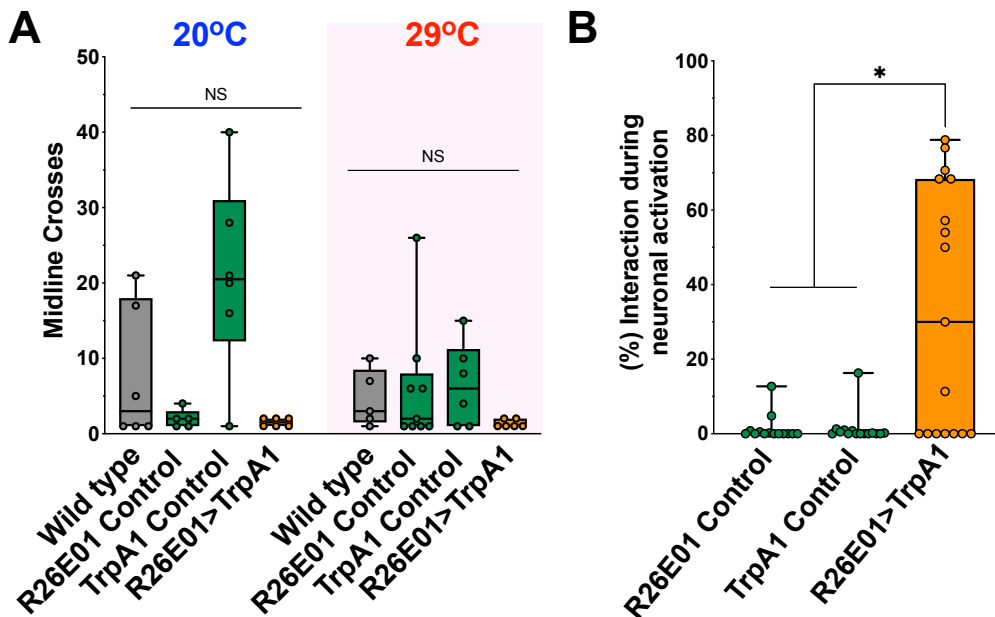

**Fig. S1. Behavioral measures of *R26E01>TrpA1*.**

**(A)** TrpA1-mediated activation of *R26E01* neurons does not alter locomotor activity. **(B)** During activation *R26E01>TrpA1* female flies interact with headless wild type females (Kruskal-Wallis,  $H=6.304$ ,  $P < 0.05$ ,  $n=14-17$  flies) longer than control genotypes *R26E01/+* ( $*P = 0.0272$ ) and *TrpA1/+* ( $*P = 0.0487$ ). Dunn's multiple comparisons *post hoc* tests determined these values. Data **(A and B)** center line, median; boxes, first and third quartiles; whiskers, range; circles represent individual values. NS, not significant  $P > 0.05$ .

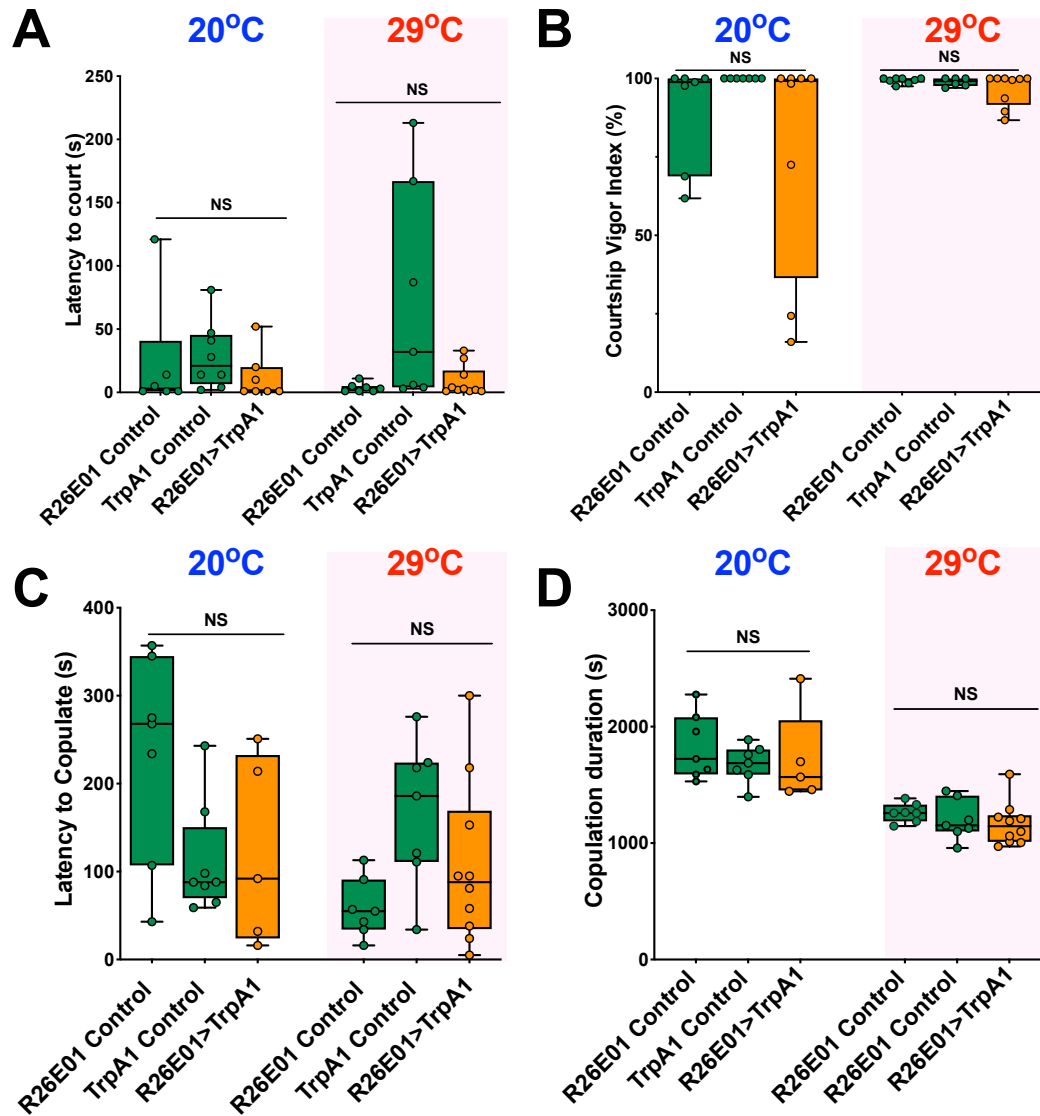

**Fig. S2. Thermogenetic activation of *R26E01-Gal4* neurons does not modulate courtship behavior.**

No effect on their latencies to **(A)** court or **(B)** copulate, **(C)** CVI or in the **(D)** duration of copulation when control genotypes *R26E01/+*, *TrpA1/+* or *R26E01>TrpA1* females were paired with wild type *Canton-S* males. NS, not significant  $P > 0.05$ . Courtship behaviors were measured over 30-minute period.

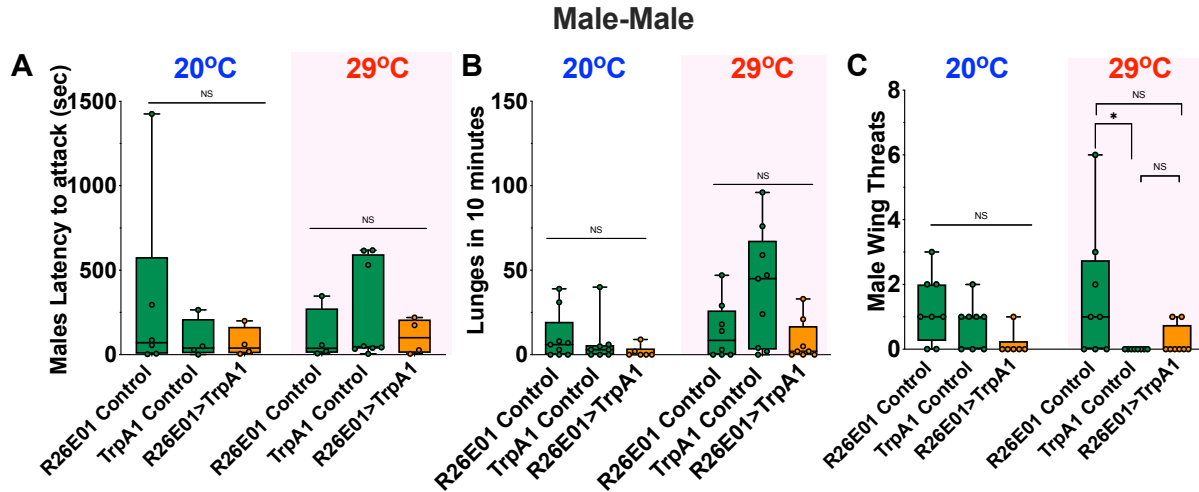

**Fig. S3. Thermogenetic activation of *R26E01-Gal4* neurons does not enhance male aggression.**

No behavioral differences found in **(A)** latencies or in the **(B)** number of lunges in *R26E01>TrpA1* male fight pairings compared to control genotypes *R26E01/+* or *TrpA1/+* male fight pairings. An increase in the **(C)** number of wing threats (Kruskal-Wallis,  $H=8.028$ ,  $P = 0.0181$ ,  $n=8-9$  pairs) was observed in *R26E01/+* ( $*P < 0.05$ ) control pairings compared to *TrpA1/+* control pairings at 29°C. However, no differences were seen between *R26E01>TrpA1* and control pairings. Dunn's multiple comparisons *post hoc* tests determined. Data **(A-C)** center line, median; boxes, first and third quartiles; whiskers, range; circles represent individual values. NS, not significant  $P > 0.05$ . Aggressive behaviors were measured over 40-minute period.



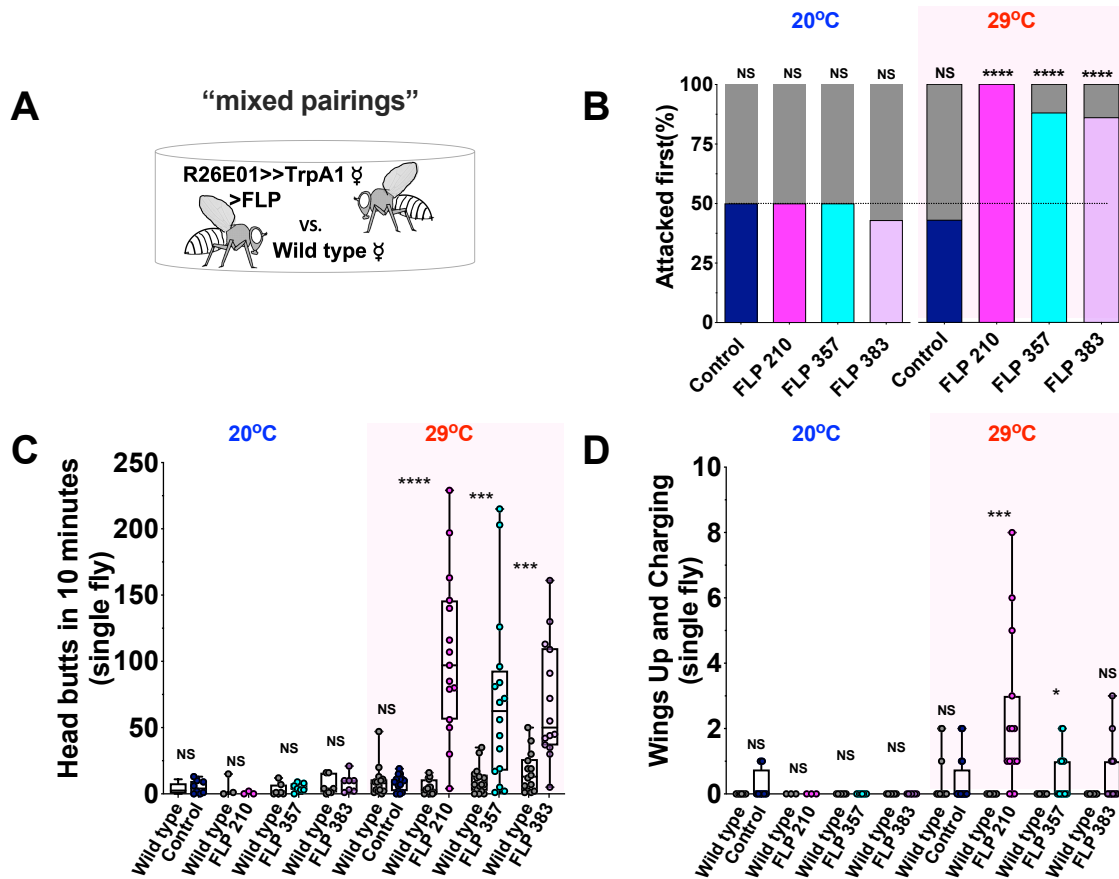

**Fig. S4. *et-FLP*  $\cap$  *R26E01* versus *Canton-S* wildtype flies.**

**(A)** Schematic of assay in which a *FLP*# $\cap$ *R26E01* female is paired with a wild type fly in a fighting chamber at 20°C or 29°C. **(B)** Percentage of flies that attacked first during fights against *Canton-S* (gray bars) opponents (Chi-square test,  $\chi^2=113.5$ ). **(C)** Number of head butts and times flies had their **(D)** wings up and charging versus their wild type opponent. Wilcoxon matched-pairs signed rank test determined the differences between measures. \*\*\*\* $P < 0.0001$ ; \*\*\* $P < 0.001$ ; \*\* $P < 0.01$ ; \* $P < 0.05$ ; NS, not significant  $P > 0.05$ ; Data **(C and D)** center line, median; boxes, first and third quartiles; whiskers, range; circles represent individual values. Aggressive behaviors were measured over 40-minute period.

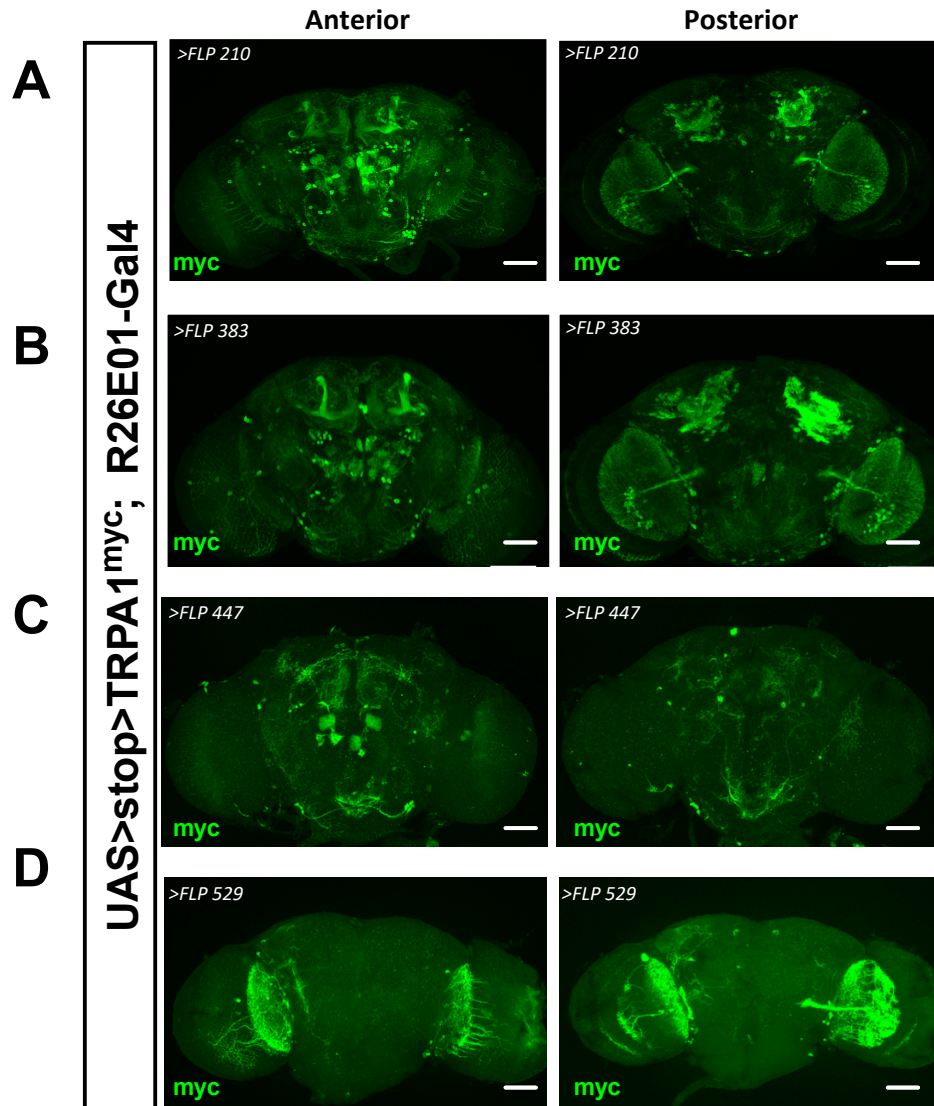

**Fig. S5. FLP library TrpA1<sup>myc</sup> expression patterns.**

Confocal Z-stack images of brains expressing TrpA1<sup>myc</sup> with anti-myc antibody (green) in **(A)** 210<sup>FLP</sup>∩R26E01, **(B)** 383<sup>FLP</sup>∩R26E01, **(C)** 447<sup>FLP</sup>∩R26E01 and **(D)** 529<sup>FLP</sup>∩R26E01.

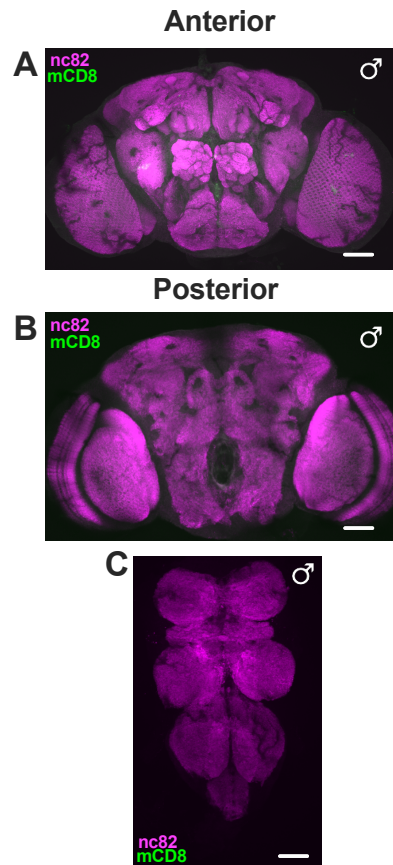

**Fig. S6. Expression in *UAS>stop>mCD8::GFP; R26E01-Gal4/dsx<sup>FLP</sup>* males.**  
No GFP (green) expression of pC1 *dsx* neurons in *UAS>stop>mCD8::GFP; R26E01-Gal4/dsx<sup>FLP</sup>* male adult brains (**A** and **B**) or abdominal ganglion (**C**) counterstained with nc82. Scale bar represents 50 $\mu$ m.

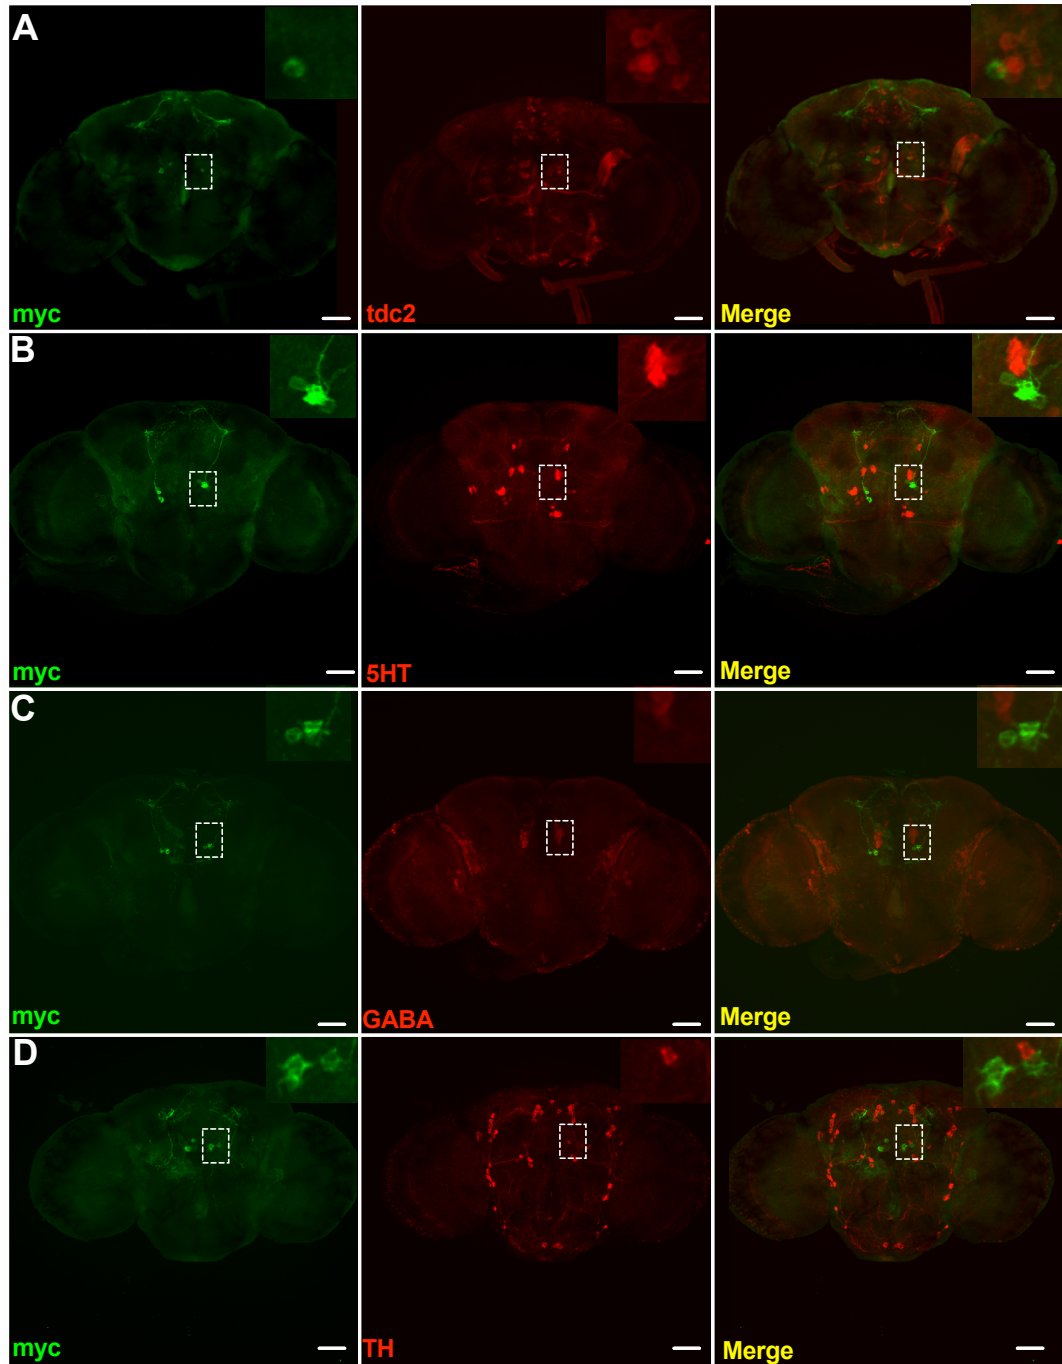

**Fig. S7. Identification of the pC1 *dsx* neurons in *UAS>stop>TrpA1<sup>myc</sup>;R26E01-Gal4/dsx<sup>FLP</sup>*.** Myc expression pattern in genotype *UAS>stop>TrpA1<sup>myc</sup>;R26E01-Gal4/dsx<sup>FLP</sup>* female brain counterstained with **(A)** anti-tdc2 **(B)** anti-5HT **(C)** anti-GABA **(E)** anti-TH. Zoomed in view of cell bodies on upper right corner of image. Scale bars represent 50 $\mu$ m.

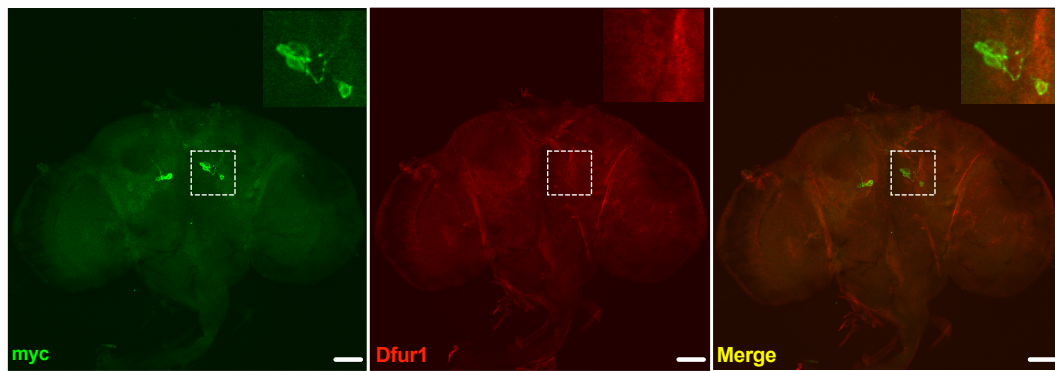

**Fig. S8. No colocalization of female pC1 *dsx* neurons and furin.** Immunostaining of myc (green) in the adult female brain of genotype *UAS>stop>TrpA1<sup>myc</sup>;R26E01-Gal4/dsx<sup>FLP</sup>* counterstained anti-dfur1 (red). Zoomed view of cell bodies on upper right corner of image. Scale bar represents 50 $\mu$ m.

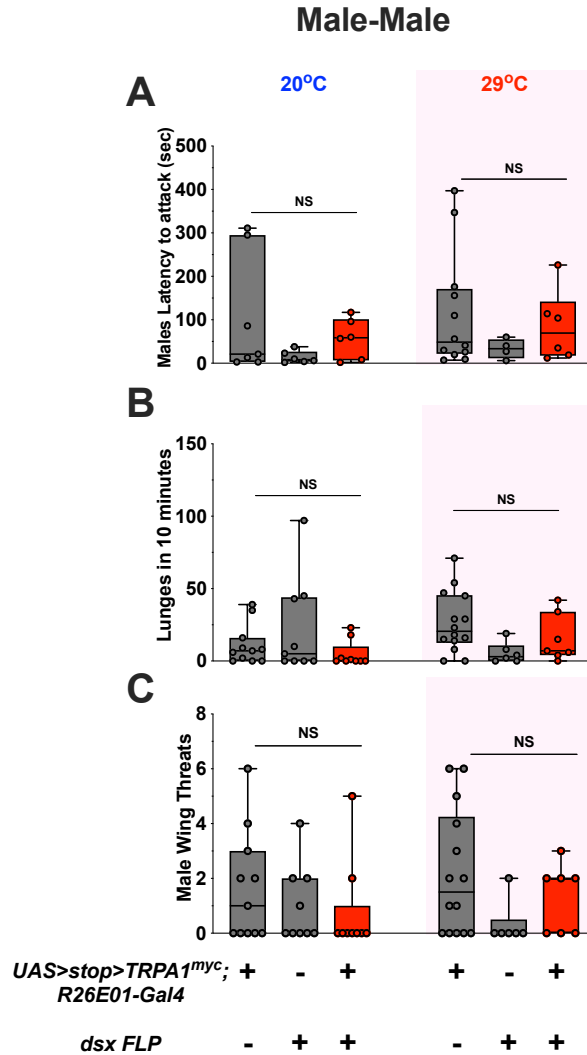

**Fig. S9.  $dsx^{FLP} \cap R26E01$  males show no aggressive phenotype.**

Activation of  $dsx^{FLP} \cap R26E01$  neurons does not affect **(A)** latencies, **(B)** number of lunges or in the **(C)** number of wing threats in male fight pairings. Data **(A-C)** center line, median; boxes, first and third quartiles; whiskers, range; circles represent individual values. NS, not significant  $P > 0.05$ . Aggressive behaviors were measured over 40-minute period.

## **Captions for Supplementary Movies 1-7**

### **Movie. S1. Wildtype *Drosophila* females fight at low intensity. *Canton-S* vs. *Canton-S*.**

Females fights contain low posture fencing, extending the middle or rear legs and contacting the opponent with the adjacent legs, head butts, and pushing. They commonly result in the sharing of resources. Movie courtesy of ref. 17. Copyright (2004) National Academy of Sciences, U.S.A

### **Movie. S2. *R26E01>TrpA1* vs. *R26E01>TrpA1* females.**

Two females with *TrpA1* activation displaying female patterns of hyper-aggression behavioral phenotype at 29°C.

### **Movie. S3. *R26E01>TrpA1* females display female fight behavior patterns.**

Fight between two *R26E01>TrpA1* females at 29°C. This behavior included females “charging” their opponent often with wings up to a 45°– 90° angle and high posture fencing. During high posture fencing both flies stand tall on their middle and rear legs while attacking their opponent with their forelegs.

### **Movie S4. *R26E01>TrpA1* vs. *Canton-S* females at 29°C.**

Female flies showed “territorial behavior.” *R26E01>TrpA1* would charge and head butt its wild type opponent until the opponent retreats. Once the fly retreats *R26E01>TrpA1* remains on the food source.

### **Movie. S5. Close up high-speed video (400 fps) of *R26E01>TrpA1* vs. *R26E01>TrpA1* female fights.**

A fight between two *R26E01>TrpA1* females at 29°C (slow rate of 10fps). One female quickly charges the other female with their wings up and then head butts her opponent. This behavior is repeated until the fly retreats and one female remains on the food cup.

**Movie. S6. *R26E01>TrpA1* vs. *R26E01>TrpA1* male fights.**

At 29°C, *TrpA1* activated males do not display aggressive behavior.

**Movie. S7. *dsx<sup>FLP</sup>∩R26E01* vs. *dsx<sup>FLP</sup>∩R26E01* female fights.**

At 20°C, *dsx<sup>FLP</sup>∩R26E01* females do not display any aggressive phenotype until *TrpA1* is activated at 29°C. Females attack the other females and display similar fighting behavior as seen in *R26E01>TrpA1* thermogenetically activated female pairings.

**Detailed genotypes and sample size for each condition**

**Figure 1B**

Females - Females

|                | <u>Control Groups</u>                                                                                                           | <u>Experimental Groups</u>                        |
|----------------|---------------------------------------------------------------------------------------------------------------------------------|---------------------------------------------------|
| <u>At 20°C</u> | Wild type <i>Canton-S</i> (n=4 flies)<br><i>w; +/+; R26E01-Gal4/+</i> (n=14 flies)<br><i>w; UAS-TrpA1/+; +/+</i> (n=9 flies)    | <i>w; UAS-TrpA1/+; R26E01-Gal4/+</i> (n=9 flies)  |
| <u>At 29°C</u> | Wild type <i>Canton-S</i> (n=13 flies)<br><i>w; +/+; R26E01-Gal4/+</i> (n=10 flies)<br><i>w; UAS-TrpA1/+; +/+</i> (n= 14 flies) | <i>w; UAS-TrpA1/+; R26E01-Gal4/+</i> (n=15 flies) |

**Figure 1C**

Females - Females

|                | <u>Control Groups</u>                                                                                                           | <u>Experimental Groups</u>                        |
|----------------|---------------------------------------------------------------------------------------------------------------------------------|---------------------------------------------------|
| <u>At 20°C</u> | Wild type <i>Canton-S</i> (n=9 pairs)<br><i>w; +/+; R26E01-Gal4/+</i> (n=14 pairs)<br><i>w; UAS-TrpA1/+; +/+</i> (n=13 pairs)   | <i>w; UAS-TrpA1/+; R26E01-Gal4/+</i> (n=12 pairs) |
| <u>At 29°C</u> | Wild type <i>Canton-S</i> (n=13 pairs)<br><i>w; +/+; R26E01-Gal4/+</i> (n=13 pairs)<br><i>w; UAS-TrpA1/+; +/+</i> (n= 17 pairs) | <i>w; UAS-TrpA1/+; R26E01-Gal4/+</i> (n=15 pairs) |

**Figure 1D**

Females - Females

|                | <u>Control Groups</u>                                                              | <u>Experimental Groups</u>                        |
|----------------|------------------------------------------------------------------------------------|---------------------------------------------------|
| <u>At 20°C</u> | Wild type <i>Canton-S</i> (n=9 pairs)<br><i>w; +/+; R26E01-Gal4/+</i> (n=14 pairs) | <i>w; UAS-TrpA1/+; R26E01-Gal4/+</i> (n=12 pairs) |



At 29°C *w;UAS-TrpA1/+; +/+* (n=13 pairs)  
 Wild type *Canton-S* (n=14 pairs)  
*w; +/+; R26E01-Gal4/+* (n=17 pairs)  
*w;UAS-TrpA1/+; +/+* (n= 19 pairs)

*w;UAS-TrpA1/+; R26E01-Gal4/+* (n=15 pairs)

**Figure 1F**

Females - Females

|                | <u>Control Groups</u>                                                              | <u>Experimental Groups</u>                                                         |
|----------------|------------------------------------------------------------------------------------|------------------------------------------------------------------------------------|
| <u>At 20°C</u> | <i>w; +/+; R26E01-Gal4/+</i> (n=6) versus Wild type <i>Canton-S</i> (n=6)          | <i>w;UAS-TrpA1/+; R26E01-Gal4/+</i> (n=5) versus Wild type <i>Canton-S</i> (n=5)   |
|                | <i>w;UAS-TrpA1/+; +/+</i> (n=8) versus Wild type <i>Canton-S</i> (n=8)             |                                                                                    |
| <u>At 29°C</u> | <i>w; +/+; R26E01-Gal4/+</i> (n=11) versus Wild type <i>Canton-S</i> (n=11)        | <i>w;UAS-TrpA1/+; R26E01-Gal4/+</i> (n=11) versus Wild type <i>Canton-S</i> (n=11) |
|                | <i>w;UAS-TrpA1/+; +/+</i> (n=7 flies) versus Wild type <i>Canton-S</i> (n=7 flies) |                                                                                    |

**Figure 1G**

Females - Females

|                | <u>Control Groups</u>                                                       | <u>Experimental Groups</u>                                                         |
|----------------|-----------------------------------------------------------------------------|------------------------------------------------------------------------------------|
| <u>At 20°C</u> | <i>w; +/+; R26E01-Gal4/+</i> (n=6) versus Wild type <i>Canton-S</i> (n=6)   | <i>w;UAS-TrpA1/+; R26E01-Gal4/+</i> (n=5) versus Wild type <i>Canton-S</i> (n=5)   |
|                | <i>w;UAS-TrpA1/+; +/+</i> (n=8) versus Wild type <i>Canton-S</i> (n=8)      |                                                                                    |
| <u>At 29°C</u> | <i>w; +/+; R26E01-Gal4/+</i> (n=11) versus Wild type <i>Canton-S</i> (n=11) | <i>w;UAS-TrpA1/+; R26E01-Gal4/+</i> (n=10) versus Wild type <i>Canton-S</i> (n=10) |
|                | <i>w;UAS-TrpA1/+; +/+</i> (n=7) versus Wild type <i>Canton-S</i> (n=7)      |                                                                                    |

**Figure 1H**

Females - Females

|                | <u>Control Groups</u>                                                       | <u>Experimental Groups</u>                                                         |
|----------------|-----------------------------------------------------------------------------|------------------------------------------------------------------------------------|
| <u>At 20°C</u> | <i>w; +/+; R26E01-Gal4/+</i> (n=6) versus Wild type <i>Canton-S</i> (n=6)   | <i>w;UAS-TrpA1/+; R26E01-Gal4/+</i> (n=5) versus Wild type <i>Canton-S</i> (n=5)   |
|                | <i>w;UAS-TrpA1/+; +/+</i> (n=8) versus Wild type <i>Canton-S</i> (n=8)      |                                                                                    |
| <u>At 29°C</u> | <i>w; +/+; R26E01-Gal4/+</i> (n=11) versus Wild type <i>Canton-S</i> (n=11) | <i>w;UAS-TrpA1/+; R26E01-Gal4/+</i> (n=10) versus Wild type <i>Canton-S</i> (n=10) |
|                | <i>w;UAS-TrpA1/+; +/+</i> (n=7) versus Wild type <i>Canton-S</i> (n=7)      |                                                                                    |

**Figure 1I**

Females - Females

| <u>Control Groups</u> | <u>Experimental Groups</u> |
|-----------------------|----------------------------|
|-----------------------|----------------------------|

|                |                                                                                                                                                                                |                                                                                                     |
|----------------|--------------------------------------------------------------------------------------------------------------------------------------------------------------------------------|-----------------------------------------------------------------------------------------------------|
| <u>At 20°C</u> | <i>w</i> ;+/+; <i>R26E01-Gal4/+</i> (n=6) versus Wild type <i>Canton-S</i> (n=6 flies)<br><br><i>w</i> ; <i>UAS-TrpA1/+</i> ; +/+ (n=8) versus Wild type <i>Canton-S</i> (n=8) | <i>w</i> ; <i>UAS-TrpA1/+</i> ; <i>R26E01-Gal4/+</i> (n=5) versus Wild type <i>Canton-S</i> (n=5)   |
| <u>At 29°C</u> | <i>w</i> ; +/+; <i>R26E01-Gal4/+</i> (n=11) versus Wild type <i>Canton-S</i> (n=11)<br><br><i>w</i> ; <i>UAS-TrpA1/+</i> ; +/+ (n=10) versus Wild type <i>Canton-S</i> (n=10)  | <i>w</i> ; <i>UAS-TrpA1/+</i> ; <i>R26E01-Gal4/+</i> (n=11) versus Wild type <i>Canton-S</i> (n=11) |

**Figure 1J** Female: *w*; *UAS-mCD8::GFP/+*; *R26E01-Gal4/+*

**Figure 2C**

Females - Females

|                | <u>Control Groups</u>                                                                      | <u>Experimental Groups</u>                                                                                                                                                                                                                                                                                                                                                                                                                                                                                                                                             |
|----------------|--------------------------------------------------------------------------------------------|------------------------------------------------------------------------------------------------------------------------------------------------------------------------------------------------------------------------------------------------------------------------------------------------------------------------------------------------------------------------------------------------------------------------------------------------------------------------------------------------------------------------------------------------------------------------|
| <u>At 20°C</u> | <i>w</i> ; <i>UAS&gt;STOP&gt;TrpA1<sup>myc</sup>/+</i> ; <i>R26E01-Gal4/+</i> (n=13 flies) | <i>w</i> ; <i>UAS&gt;STOP&gt;TrpA1<sup>myc</sup>/210<sup>FLP</sup></i> ; <i>R26E01-Gal4/+</i> (n=8 flies)<br><br><i>w</i> ; <i>UAS&gt;STOP&gt;TrpA1<sup>myc</sup>/357<sup>FLP</sup></i> ; <i>R26E01-Gal4/+</i> (n=9 flies)<br><i>w</i> ; <i>UAS&gt;STOP&gt;TrpA1<sup>myc</sup>/+</i> ; <i>R26E01-Gal4/383<sup>FLP</sup></i> (n=7 flies)<br><i>w</i> ; <i>UAS&gt;STOP&gt;TrpA1<sup>myc</sup>/+</i> ; <i>R26E01-Gal4/447<sup>FLP</sup></i> (n=6 flies)<br><i>w</i> ; <i>UAS&gt;STOP&gt;TrpA1<sup>myc</sup>/529<sup>FLP</sup></i> ; <i>R26E01-Gal4/+</i> (n=5 flies)      |
| <u>At 29°C</u> | <i>w</i> ; <i>UAS&gt;STOP&gt;TrpA1<sup>myc</sup>/+</i> ; <i>R26E01-Gal4/+</i> (n=20 flies) | <i>w</i> ; <i>UAS&gt;STOP&gt;TrpA1<sup>myc</sup>/210<sup>FLP</sup></i> ; <i>R26E01-Gal4/+</i> (n=15 flies)<br><br><i>w</i> ; <i>UAS&gt;STOP&gt;TrpA1<sup>myc</sup>/357<sup>FLP</sup></i> ; <i>R26E01-Gal4/+</i> (n=15 flies)<br><i>w</i> ; <i>UAS&gt;STOP&gt;TrpA1<sup>myc</sup>/+</i> ; <i>R26E01-Gal4/383<sup>FLP</sup></i> (n=15 flies)<br><i>w</i> ; <i>UAS&gt;STOP&gt;TrpA1<sup>myc</sup>/+</i> ; <i>R26E01-Gal4/447<sup>FLP</sup></i> (n=15 flies)<br><i>w</i> ; <i>UAS&gt;STOP&gt;TrpA1<sup>myc</sup>/529<sup>FLP</sup></i> ; <i>R26E01-Gal4/+</i> (n=15 flies) |

**Figure 2D**

Females - Females

|                | <u>Control Groups</u>                                                                      | <u>Experimental Groups</u>                                                                                                                                                                                                                                                                                                                                                                                                                                                                                                                                             |
|----------------|--------------------------------------------------------------------------------------------|------------------------------------------------------------------------------------------------------------------------------------------------------------------------------------------------------------------------------------------------------------------------------------------------------------------------------------------------------------------------------------------------------------------------------------------------------------------------------------------------------------------------------------------------------------------------|
| <u>At 20°C</u> | <i>w</i> ; <i>UAS&gt;STOP&gt;TrpA1<sup>myc</sup>/+</i> ; <i>R26E01-Gal4/+</i> (n=9 pairs)  | <i>w</i> ; <i>UAS&gt;STOP&gt;TrpA1<sup>myc</sup>/210<sup>FLP</sup></i> ; <i>R26E01-Gal4/+</i> (n=7 pairs)<br><br><i>w</i> ; <i>UAS&gt;STOP&gt;TrpA1<sup>myc</sup>/357<sup>FLP</sup></i> ; <i>R26E01-Gal4/+</i> (n=10 pairs)<br><i>w</i> ; <i>UAS&gt;STOP&gt;TrpA1<sup>myc</sup>/+</i> ; <i>R26E01-Gal4/383<sup>FLP</sup></i> (n=7 pairs)<br><i>w</i> ; <i>UAS&gt;STOP&gt;TrpA1<sup>myc</sup>/+</i> ; <i>R26E01-Gal4/447<sup>FLP</sup></i> (n=9 pairs)<br><i>w</i> ; <i>UAS&gt;STOP&gt;TrpA1<sup>myc</sup>/529<sup>FLP</sup></i> ; <i>R26E01-Gal4/+</i> (n=7 pairs)     |
| <u>At 29°C</u> | <i>w</i> ; <i>UAS&gt;STOP&gt;TrpA1<sup>myc</sup>/+</i> ; <i>R26E01-Gal4/+</i> (n=17 pairs) | <i>w</i> ; <i>UAS&gt;STOP&gt;TrpA1<sup>myc</sup>/210<sup>FLP</sup></i> ; <i>R26E01-Gal4/+</i> (n=15 pairs)<br><br><i>w</i> ; <i>UAS&gt;STOP&gt;TrpA1<sup>myc</sup>/357<sup>FLP</sup></i> ; <i>R26E01-Gal4/+</i> (n=15 pairs)<br><i>w</i> ; <i>UAS&gt;STOP&gt;TrpA1<sup>myc</sup>/+</i> ; <i>R26E01-Gal4/383<sup>FLP</sup></i> (n=15 pairs)<br><i>w</i> ; <i>UAS&gt;STOP&gt;TrpA1<sup>myc</sup>/+</i> ; <i>R26E01-Gal4/447<sup>FLP</sup></i> (n=12 pairs)<br><i>w</i> ; <i>UAS&gt;STOP&gt;TrpA1<sup>myc</sup>/529<sup>FLP</sup></i> ; <i>R26E01-Gal4/+</i> (n=14 pairs) |
| <u>At 29°C</u> |                                                                                            | <i>w</i> ; <i>UAS&gt;STOP&gt;TrpA1<sup>myc</sup>/529<sup>FLP</sup></i> ; <i>R26E01-Gal4/+</i> (n=14 pairs)                                                                                                                                                                                                                                                                                                                                                                                                                                                             |

**Figure 2E**

Females - Females

|                | <u>Control Groups</u>                                                      | <u>Experimental Groups</u>                                                                                                                                                                                                                                                                                                                                                                                                                                                             |
|----------------|----------------------------------------------------------------------------|----------------------------------------------------------------------------------------------------------------------------------------------------------------------------------------------------------------------------------------------------------------------------------------------------------------------------------------------------------------------------------------------------------------------------------------------------------------------------------------|
| <u>At 20°C</u> | <i>w; UAS&gt;STOP&gt;TrpA1<sup>myc</sup>/+; R26E01-Gal4/+</i> (n=9 pairs)  | <i>w; UAS&gt;STOP&gt;TrpA1<sup>myc</sup>/210<sup>FLP</sup>; R26E01-Gal4/+</i> (n=7 pairs)<br><br><i>w; UAS&gt;STOP&gt;TrpA1<sup>myc</sup>/357<sup>FLP</sup>; R26E01-Gal4/+</i> (n=10 pairs)<br><i>w; UAS&gt;STOP&gt;TrpA1<sup>myc</sup>/+; R26E01-Gal4/383<sup>FLP</sup></i> (n=7 pairs)<br><i>w; UAS&gt;STOP&gt;TrpA1<sup>myc</sup>/+; R26E01-Gal4/447<sup>FLP</sup></i> (n=9 pairs)<br><i>w; UAS&gt;STOP&gt;TrpA1<sup>myc</sup>/529<sup>FLP</sup>; R26E01-Gal4/+</i> (n=7 pairs)     |
| <u>At 29°C</u> | <i>w; UAS&gt;STOP&gt;TrpA1<sup>myc</sup>/+; R26E01-Gal4/+</i> (n=17 pairs) | <i>w; UAS&gt;STOP&gt;TrpA1<sup>myc</sup>/210<sup>FLP</sup>; R26E01-Gal4/+</i> (n=15 pairs)<br><br><i>w; UAS&gt;STOP&gt;TrpA1<sup>myc</sup>/357<sup>FLP</sup>; R26E01-Gal4/+</i> (n=15 pairs)<br><i>w; UAS&gt;STOP&gt;TrpA1<sup>myc</sup>/+; R26E01-Gal4/383<sup>FLP</sup></i> (n=15 pairs)<br><i>w; UAS&gt;STOP&gt;TrpA1<sup>myc</sup>/+; R26E01-Gal4/447<sup>FLP</sup></i> (n=11 pairs)<br><i>w; UAS&gt;STOP&gt;TrpA1<sup>myc</sup>/529<sup>FLP</sup>; R26E01-Gal4/+</i> (n=14 pairs) |

**Figure 2F** Female: *w; UAS>STOP>TrpA1<sup>myc</sup>/357<sup>FLP</sup>; R26E01-Gal4/+***Figure 2F'** Female: *w; UAS>STOP>TrpA1<sup>myc</sup>/357<sup>FLP</sup>; R26E01 Gal4/+* Male: *w/Y; UAS>STOP>TrpA1<sup>myc</sup>/357<sup>FLP</sup>; R26E01-Gal4/+***Figure 3A-C** Female: *w; UAS>STOP>mC8::GFP/+; R26E01-Gal4/dsx<sup>FLP</sup>***Figure 3D-E** Female: *w; UAS>STOP>nysb/+; R26E01-Gal4/dsx<sup>FL</sup>***Figure 4** Females: *w; UAS>STOP>mC8::GFP/+; R26E01-Gal4/dsx<sup>FLP</sup>***Figure 5A**

Females - Females

|                | <u>Control Groups</u>                                                                                                                                                 | <u>Experimental Groups</u>                                                                 |
|----------------|-----------------------------------------------------------------------------------------------------------------------------------------------------------------------|--------------------------------------------------------------------------------------------|
| <u>At 20°C</u> | Wild type <i>Canton-S</i> (n=7 flies)<br><i>w; UAS&gt;STOP&gt;TrpA1<sup>myc</sup>/+; R26E01-Gal4/+</i> (n=7 flies)<br><i>w; +/+; dsx<sup>FLP</sup>/+</i> (n=7 flies)  | <i>w; UAS&gt;STOP&gt;TrpA1<sup>myc</sup>/+; R26E01-Gal4/dsx<sup>FLP</sup></i> (n=5 flies)  |
| <u>At 29°C</u> | Wild type <i>Canton-S</i> (n=4 flies)<br><i>w; UAS&gt;STOP&gt;TrpA1<sup>myc</sup>/+; R26E01-Gal4/+</i> (n=11 flies)<br><i>w; +/+; dsx<sup>FLP</sup>/+</i> (n=4 flies) | <i>w; UAS&gt;STOP&gt;TrpA1<sup>myc</sup>/+; R26E01-Gal4/dsx<sup>FLP</sup></i> (n=11 flies) |

**Figure 5B**

Females - Females

|                | <u>Control Groups</u>                 | <u>Experimental Groups</u>                                                                |
|----------------|---------------------------------------|-------------------------------------------------------------------------------------------|
| <u>At 20°C</u> | Wild type <i>Canton-S</i> (n=5 pairs) | <i>w; UAS&gt;STOP&gt;TrpA1<sup>myc</sup>/+; R26E01-Gal4/dsx<sup>FLP</sup></i> (n=9 pairs) |

w; UAS>STOP>TrpA1<sup>myc/+</sup>; R26E01-Gal4/+ (n=9 pairs)

w; +/+; dsx<sup>FLP/+</sup> (n=9 pairs)

At 29°C

Wild type *Canton-S* (n=9 pairs)

w; UAS>STOP>TrpA1<sup>myc/+</sup>; R26E01-Gal4/dsx<sup>FLP</sup> (n=11 pairs)

w; UAS>STOP>TrpA1<sup>myc/+</sup>; R26E01-Gal4/+ (n=9 pairs)

w; +/+; dsx<sup>FLP/+</sup> (n=7 pairs)

**Figure 5C**

Females - Females

Control Groups

Experimental Groups

At 20°C

Wild type *Canton-S* (n=6 pairs)

w; UAS>STOP>TrpA1<sup>myc/+</sup>; R26E01-Gal4/dsx<sup>FLP</sup> (n=9 pairs)

w; UAS>STOP>TrpA1<sup>myc/+</sup>; R26E01-Gal4/+ (n=9 pairs)

w; +/+; dsx<sup>FLP/+</sup> (n=7 pairs)

At 29°C

Wild type *Canton-S* (n=9 pairs)

w; UAS>STOP>TrpA1<sup>myc/+</sup>; R26E01-Gal4/dsx<sup>FLP</sup> (n=11 pairs)

w; UAS>STOP>TrpA1<sup>myc/+</sup>; R26E01-Gal4/+ (n=8 pairs)

w; +/+; dsx<sup>FLP/+</sup> (n=7 pairs)

**Figure 5D**

Females - Females

Control Groups

Experimental Groups

w; UAS>STOP>Kir2.1/+; R26E01-Gal4/+ (n=7 flies)

w; UAS>STOP> Kir2.1/+; R26E01-Gal4/dsx<sup>FLP</sup> (n=7 flies)

w; +/+; dsx<sup>FLP/+</sup> (n=7 flies)

**Figure 5E**

Females - Females

Control Groups

Experimental Groups

w; UAS>STOP>Kir2.1/+; R26E01-Gal4/+ (n=8 pairs)

w; UAS>STOP> Kir2.1/+; R26E01-Gal4/dsx<sup>FLP</sup> (n=7 pairs)

w; +/+; dsx<sup>FLP/+</sup> (n=7 pairs)

**Figure 5F**

Females - Females

Control Groups

Experimental Groups

w; UAS>STOP>Kir2.1/+; R26E01-Gal4/+ (n=8 pairs)

w; UAS>STOP> Kir2.1/+; R26E01-Gal4/dsx<sup>FLP</sup> (n=7 pairs)

w; +/+; dsx<sup>FLP/+</sup> (n=7 pairs)

**Figure S1A**

Females - Females

Control Groups

Experimental Groups

At 20°C

Wild type *Canton-S* (n=6 flies)

w; UAS-TrpA1/+; R26E01-Gal4/+ (n=6 flies)

|                |                                          |                                                 |
|----------------|------------------------------------------|-------------------------------------------------|
|                | <i>w; +/+; R26E01-Gal4/+</i> (n=5 flies) |                                                 |
|                | <i>w;UAS-TrpA1/+; +/+</i> (n=6 flies)    |                                                 |
| <u>At 29°C</u> | Wild type <i>Canton-S</i> (n=5 flies)    | <i>w;UAS-TrpA1/+; R26E01-Gal4/+</i> (n=6 flies) |
|                | <i>w; +/+; R26E01-Gal4/+</i> (n=9 flies) |                                                 |
|                | <i>w;UAS-TrpA1/+; +/+</i> (n= 6 flies)   |                                                 |

**Figure S1B**

Females - Headless females (Wild type *Canton-S*)

|  | <u>Control Groups</u>                     | <u>Experimental Groups</u>                       |
|--|-------------------------------------------|--------------------------------------------------|
|  | <i>w; +/+; R26E01-Gal4/+</i> (n=14 flies) | <i>w;UAS-TrpA1/+; R26E01-Gal4/+</i> (n=17 flies) |
|  | <i>w;UAS-TrpA1/+; +/+</i> (n= 15 flies)   |                                                  |

**Figure S2A**

Females - Males (Wild type *Canton-S*)

|                | <u>Control Groups</u>                    | <u>Experimental Groups</u>                       |
|----------------|------------------------------------------|--------------------------------------------------|
| <u>At 20°C</u> | <i>w;+/+;R26E01-Gal4/+</i> (n=6 flies)   | <i>w;UAS-TrpA1/+; R26E01-Gal4/+</i> (n=7 flies)  |
|                | <i>w;UAS-TrpA1/+; +/+</i> (n= 8 flies)   |                                                  |
| <u>At 29°C</u> | <i>w; +/+; R26E01-Gal4/+</i> (n=7 flies) | <i>w;UAS-TrpA1/+; R26E01-Gal4/+</i> (n=10 flies) |
|                | <i>w;UAS-TrpA1/+; +/+</i> (n=7 flies)    |                                                  |

**Figure S2B**

Females - Males (Wild type *Canton-S*)

|                | <u>Control Groups</u>                  | <u>Experimental Groups</u>                      |
|----------------|----------------------------------------|-------------------------------------------------|
| <u>At 20°C</u> | <i>w;+/+;R26E01-Gal4/+</i> (n=7 flies) | <i>w;UAS-TrpA1/+;R26E01-Gal4/+</i> (n=8 flies)  |
|                | <i>w;UAS-TrpA1/+;+/+</i> (n= 8 flies)  |                                                 |
| <u>At 29°C</u> | <i>w;+/+;R26E01-Gal4/+</i> (n=8 flies) | <i>w;UAS-TrpA1/+; R26E01-Gal4/+</i> (n=9 flies) |
|                | <i>w;UAS-TrpA1/+; +/+</i> (n=6 flies)  |                                                 |

**Figure S2C**

Females - Males (Wild type *Canton-S*)

|                | <u>Control Groups</u>                  | <u>Experimental Groups</u>                      |
|----------------|----------------------------------------|-------------------------------------------------|
| <u>At 20°C</u> | <i>w;+/+;R26E01-Gal4/+</i> (n=7 flies) | <i>w;UAS-TrpA1/+;R26E01-Gal4/+</i> (n=5 flies)  |
|                | <i>w;UAS-TrpA1/+; +/+</i> (n= 8 flies) |                                                 |
| <u>At 29°C</u> | <i>w;+/+;R26E01-Gal4/+</i> (n=7 flies) | <i>w;UAS-TrpA1/+;R26E01-Gal4/+</i> (n=10 flies) |
|                | <i>w;UAS-TrpA1/+; +/+</i> (n=7 flies)  |                                                 |

**Figure S2D**

Females - Males (Wild type *Canton-S*)

|  | <u>Control Groups</u> | <u>Experimental Groups</u> |
|--|-----------------------|----------------------------|
|--|-----------------------|----------------------------|

|                   |                                                                                                                              |                                                                                                                                                                                                                                                                                                                                                                                                                                                |
|-------------------|------------------------------------------------------------------------------------------------------------------------------|------------------------------------------------------------------------------------------------------------------------------------------------------------------------------------------------------------------------------------------------------------------------------------------------------------------------------------------------------------------------------------------------------------------------------------------------|
| <u>At 20°C</u>    | <i>w</i> ;+/+; <i>R26E01-Gal4/+</i> (n=7 flies)<br><i>w</i> ; <i>UAS-TrpA1/+</i> ; +/+ (n= 7 flies)                          | <i>w</i> ; <i>UAS-TrpA1/+</i> ; <i>R26E01-Gal4/+</i> (n=5 flies)                                                                                                                                                                                                                                                                                                                                                                               |
| <u>At 29°C</u>    | <i>w</i> ;+/+; <i>R26E01-Gal4/+</i> (n=7 flies)<br><i>w</i> ; <i>UAS-TrpA1/+</i> ; +/+ (n=7 flies)                           | <i>w</i> ; <i>UAS-TrpA1/+</i> ; <i>R26E01-Gal4/+</i> (n=10 flies)                                                                                                                                                                                                                                                                                                                                                                              |
| <b>Figure S3A</b> |                                                                                                                              | Males - Males                                                                                                                                                                                                                                                                                                                                                                                                                                  |
|                   | <u>Control Groups</u>                                                                                                        | <u>Experimental Groups</u>                                                                                                                                                                                                                                                                                                                                                                                                                     |
| <u>At 20°C</u>    | <i>w</i> / <i>Y</i> ; +/+; <i>R26E01-Gal4/+</i> (n=6 flies)<br><i>w</i> / <i>Y</i> ; <i>UAS-TrpA1/+</i> ; +/+ (n=4 flies)    | <i>w</i> / <i>Y</i> ; <i>UAS-TrpA1/+</i> ; <i>R26E01-Gal4/+</i> (n=4 flies)                                                                                                                                                                                                                                                                                                                                                                    |
| <u>At 29°C</u>    | <i>w</i> / <i>Y</i> ; +/+; <i>R26E01-Gal4/+</i> (n=4 flies)<br><i>w</i> / <i>Y</i> ; <i>UAS-TrpA1/+</i> ; +/+ (n=8 flies)    | <i>w</i> / <i>Y</i> ; <i>UAS-TrpA1/+</i> ; <i>R26E01-Gal4/+</i> (n=4 flies)                                                                                                                                                                                                                                                                                                                                                                    |
| <b>Figure S3B</b> |                                                                                                                              | Males - Males                                                                                                                                                                                                                                                                                                                                                                                                                                  |
|                   | <u>Control Groups</u>                                                                                                        | <u>Experimental Groups</u>                                                                                                                                                                                                                                                                                                                                                                                                                     |
| <u>At 20°C</u>    | <i>w</i> / <i>Y</i> ; +/+; <i>R26E01-Gal4/+</i> (n=9 pairs)<br><i>w</i> / <i>Y</i> ; <i>UAS-TrpA1/+</i> ; +/+ (n=8 pairs)    | <i>w</i> / <i>Y</i> ; <i>UAS-TrpA1/+</i> ; <i>R26E01-Gal4/+</i> (n=6 pairs)                                                                                                                                                                                                                                                                                                                                                                    |
| <u>At 29°C</u>    | <i>w</i> / <i>Y</i> ; +/+; <i>R26E01-Gal4/+</i> (n=8 pairs)<br><i>w</i> / <i>Y</i> ; <i>UAS-TrpA1/+</i> ; +/+ (n=9 pairs)    | <i>w</i> / <i>Y</i> ; <i>UAS-TrpA1/+</i> ; <i>R26E01-Gal4/+</i> (n=8 pairs)                                                                                                                                                                                                                                                                                                                                                                    |
| <b>Figure S3C</b> |                                                                                                                              | Males - Males                                                                                                                                                                                                                                                                                                                                                                                                                                  |
|                   | <u>Control Groups</u>                                                                                                        | <u>Experimental Groups</u>                                                                                                                                                                                                                                                                                                                                                                                                                     |
| <u>At 20°C</u>    | <i>w</i> / <i>Y</i> ; +/+; <i>R26E01-Gal4/+</i> (n=8 pairs)<br><i>w</i> / <i>Y</i> ; <i>UAS-TrpA1/+</i> ; +/+ (n=8 pairs)    | <i>w</i> / <i>Y</i> ; <i>UAS-TrpA1/+</i> ; <i>R26E01-Gal4/+</i> (n=6 pairs)                                                                                                                                                                                                                                                                                                                                                                    |
| <u>At 29°C</u>    | <i>w</i> / <i>Y</i> ; +/+; <i>R26E01-Gal4/+</i> (n=8 pairs)<br><i>w</i> / <i>Y</i> ; <i>UAS-TrpA1/+</i> ; +/+ (n=9 pairs)    | <i>w</i> / <i>Y</i> ; <i>UAS-TrpA1/+</i> ; <i>R26E01-Gal4/+</i> (n=8 pairs)                                                                                                                                                                                                                                                                                                                                                                    |
| <b>Figure S4B</b> |                                                                                                                              | Females - Females                                                                                                                                                                                                                                                                                                                                                                                                                              |
|                   | <u>Control Groups</u>                                                                                                        | <u>Experimental Groups</u>                                                                                                                                                                                                                                                                                                                                                                                                                     |
| <u>At 20°C</u>    | <i>w</i> ; <i>UAS&gt;STOP&gt;TrpA1<sup>myc/+</sup></i> ; <i>R26E01-Gal4/+</i> (n=8) versus Wildtype <i>Canton-S</i> (n=8)    | <i>w</i> ; <i>UAS&gt;STOP&gt;TrpA1<sup>myc/210<sup>FLP</sup></sup></i> ; <i>R26E01-Gal4/+</i> (n=4) versus Wild type <i>Canton-S</i> (n=4)<br><br><i>w</i> ; <i>UAS&gt;STOP&gt;TrpA1<sup>myc/357<sup>FLP</sup></sup></i> ; <i>R26E01-Gal4/+</i> (n=8) versus Wild type <i>Canton-S</i> (n=8)<br><br><i>w</i> ; <i>UAS&gt;STOP&gt;TrpA1<sup>myc/+</sup></i> ; <i>R26E01-Gal4/383<sup>FLP</sup></i> (n=8) versus Wild type <i>Canton-S</i> (n=8) |
| <u>At 29°C</u>    | <i>w</i> ; <i>UAS&gt;STOP&gt;TrpA1<sup>myc/+</sup></i> ; <i>R26E01-Gal4/+</i> (n=13) versus Wild type <i>Canton-S</i> (n=13) | <i>w</i> ; <i>UAS&gt;STOP&gt;TrpA1<sup>myc/210<sup>FLP</sup></sup></i> ; <i>R26E01-Gal4/+</i> (n=8) versus Wild type <i>Canton-S</i> (n=8)                                                                                                                                                                                                                                                                                                     |
| <u>At 29°C</u>    |                                                                                                                              | <i>w</i> ; <i>UAS&gt;STOP&gt;TrpA1<sup>myc/357<sup>FLP</sup></sup></i> ; <i>R26E01-Gal4/+</i> (n=9) versus Wild type <i>Canton-S</i> (n=9)<br><br><i>w</i> ; <i>UAS&gt;STOP&gt;TrpA1<sup>myc/+</sup></i> ; <i>R26E01-Gal4/383<sup>FLP</sup></i> (n=10) versus Wild type <i>Canton-S</i> (n=10)                                                                                                                                                 |

|                   |                                                                                                              | Females - Females                                                                                                                                                                                                                                                                                                                                                                                    |  |
|-------------------|--------------------------------------------------------------------------------------------------------------|------------------------------------------------------------------------------------------------------------------------------------------------------------------------------------------------------------------------------------------------------------------------------------------------------------------------------------------------------------------------------------------------------|--|
| <b>Figure S4C</b> | <u>Control Groups</u>                                                                                        | <u>Experimental Groups</u>                                                                                                                                                                                                                                                                                                                                                                           |  |
| <u>At 20°C</u>    | <i>w; UAS&gt;STOP&gt;TrpA1<sup>myc/+</sup>; R26E01-Gal4/+</i> (n=8) versus Wild type <i>Canton-S</i> (n=8)   | <i>w; UAS&gt;STOP&gt;TrpA1<sup>myc/210<sup>FLP</sup></sup>; R26E01-Gal4/+</i> (n=3) versus Wild type <i>Canton-S</i> (n=3)<br><br><i>w; UAS&gt;STOP&gt;TrpA1<sup>myc/357<sup>FLP</sup></sup>; R26E01-Gal4/+</i> (n=7) versus Wild type <i>Canton-S</i> (n=7)<br><br><i>w; UAS&gt;STOP&gt;TrpA1<sup>myc/+</sup>; R26E01-Gal4/383<sup>FLP</sup></i> (n=7) versus Wild type <i>Canton-S</i> (n=7)       |  |
| <u>At 29°C</u>    | <i>w; UAS&gt;STOP&gt;TrpA1<sup>myc/+</sup>; R26E01-Gal4/+</i> (n=16) versus Wild type <i>Canton-S</i> (n=16) | <i>w; UAS&gt;STOP&gt;TrpA1<sup>myc/210<sup>FLP</sup></sup>; R26E01-Gal4/+</i> (n=15) versus Wild type <i>Canton-S</i> (n=15)<br><br><i>w; UAS&gt;STOP&gt;TrpA1<sup>myc/357<sup>FLP</sup></sup>; R26E01-Gal4/+</i> (n=16) versus Wild type <i>Canton-S</i> (n=16)<br><br><i>w; UAS&gt;STOP&gt;TrpA1<sup>myc/+</sup>; R26E01-Gal4/383<sup>FLP</sup></i> (n=14) versus Wild type <i>Canton-S</i> (n=14) |  |

|                   |                                                                                                              | Females - Females                                                                                                                                                                                                                                                                                                                                                                                    |  |
|-------------------|--------------------------------------------------------------------------------------------------------------|------------------------------------------------------------------------------------------------------------------------------------------------------------------------------------------------------------------------------------------------------------------------------------------------------------------------------------------------------------------------------------------------------|--|
| <b>Figure S4D</b> | <u>Control Groups</u>                                                                                        | <u>Experimental Groups</u>                                                                                                                                                                                                                                                                                                                                                                           |  |
| <u>At 20°C</u>    | <i>w; UAS&gt;STOP&gt;TrpA1<sup>myc/+</sup>; R26E01-Gal4/+</i> (n=8) versus Wild type <i>Canton-S</i> (n=8)   | <i>w; UAS&gt;STOP&gt;TrpA1<sup>myc/210<sup>FLP</sup></sup>; R26E01-Gal4/+</i> (n=3) versus Wild type <i>Canton-S</i> (n=3)<br><br><i>w; UAS&gt;STOP&gt;TrpA1<sup>myc/357<sup>FLP</sup></sup>; R26E01-Gal4/+</i> (n=7) versus Wild type <i>Canton-S</i> (n=7)<br><br><i>w; UAS&gt;STOP&gt;TrpA1<sup>myc/+</sup>; R26E01-Gal4/383<sup>FLP</sup></i> (n=7) versus Wild type <i>Canton-S</i> (n=7)       |  |
| <u>At 29°C</u>    | <i>w; UAS&gt;STOP&gt;TrpA1<sup>myc/+</sup>; R26E01-Gal4/+</i> (n=16) versus Wild type <i>Canton-S</i> (n=16) | <i>w; UAS&gt;STOP&gt;TrpA1<sup>myc/210<sup>FLP</sup></sup>; R26E01-Gal4/+</i> (n=15) versus Wild type <i>Canton-S</i> (n=15)<br><br><i>w; UAS&gt;STOP&gt;TrpA1<sup>myc/357<sup>FLP</sup></sup>; R26E01-Gal4/+</i> (n=16) versus Wild type <i>Canton-S</i> (n=16)<br><br><i>w; UAS&gt;STOP&gt;TrpA1<sup>myc/+</sup>; R26E01-Gal4/383<sup>FLP</sup></i> (n=14) versus Wild type <i>Canton-S</i> (n=14) |  |

**Figure S5A** Female: *w; UAS>STOP>TrpA1<sup>myc/210<sup>FLP</sup></sup>; R26E01-Gal4/+*

**Figure S5B** Female: *w; UAS>STOP>TrpA1<sup>myc/+</sup>; R26E01-Gal4/383<sup>FLP</sup>*

**Figure S5C** Female: *w; UAS>STOP>TrpA1<sup>myc/+</sup>; R26E01-Gal4/447<sup>FLP</sup>*

**Figure S5D** Female: *w; UAS>STOP>TrpA1<sup>myc/529<sup>FLP</sup></sup>; R26E01-Gal4/+*

**Figure S6** Male: *w/Y; UAS>STOP>mC8::GFP/+; R26E01-Gal4/dsx<sup>FLP</sup>*

**Figure S7-S8** Female: *w; UAS>STOP> TrpA1<sup>myc</sup> /+; R26E01-Gal4/dsx<sup>FLP</sup>*

|                   |                                                                             | Males - Males                                                                               |  |
|-------------------|-----------------------------------------------------------------------------|---------------------------------------------------------------------------------------------|--|
| <b>Figure S9A</b> | <u>Control Groups</u>                                                       | <u>Experimental Groups</u>                                                                  |  |
| <u>At 20°C</u>    | <i>w/Y; UAS&gt;STOP&gt;TrpA1<sup>myc/+</sup>; R26E01-Gal4/+</i> (n=7 flies) | <i>w/Y; UAS&gt;STOP&gt;TrpA1<sup>myc/+</sup>; R26E01-Gal4/dsx<sup>FLP</sup></i> (n=6 flies) |  |

|                     |                                                                                       |                                                                                             |
|---------------------|---------------------------------------------------------------------------------------|---------------------------------------------------------------------------------------------|
|                     | <i>w/Y; +/+; dsx<sup>FLP</sup>/+</i> (n=6 flies)                                      |                                                                                             |
| <u>At 29°C</u>      | <i>w/Y; UAS&gt;STOP&gt;TrpA1<sup>myc</sup>/+; R26E01-Gal4/+</i> (n=12 flies)          | <i>w/Y; UAS&gt;STOP&gt;TrpA1<sup>myc</sup>/+; R26E01-Gal4/dsx<sup>FLP</sup></i> (n=6 flies) |
|                     | <i>w/Y; +/+; dsx<sup>FLP</sup>/+</i> (n=4 flies)                                      |                                                                                             |
| <b>Figure S9B</b>   |                                                                                       | Males - Males                                                                               |
|                     | <u>Control Groups</u>                                                                 | <u>Experimental Groups</u>                                                                  |
| <u>At 20°C</u>      | <i>w/Y; UAS&gt;STOP&gt;TrpA1<sup>myc</sup>/+; R26E01-Gal4/+</i> (n=11 pairs)          | <i>w/Y; UAS&gt;STOP&gt;TrpA1<sup>myc</sup>/+; R26E01-Gal4/dsx<sup>FLP</sup></i> (n=9 pairs) |
|                     | <i>w/Y; +/+; dsx<sup>FLP</sup>/+</i> (n=9 flies)                                      |                                                                                             |
| <u>At 29°C</u>      | <i>w/Y; UAS&gt;STOP&gt;TrpA1<sup>myc</sup>/+; R26E01-Gal4/+</i> (n=14 pairs)          | <i>w/Y; UAS&gt;STOP&gt;TrpA1<sup>myc</sup>/+; R26E01-Gal4/dsx<sup>FLP</sup></i> (n=7 pairs) |
|                     | <i>w/Y; +/+; dsx<sup>FLP</sup>/+</i> (n=6 pairs)                                      |                                                                                             |
| <b>Figure S9C</b>   |                                                                                       | Males - Males                                                                               |
| <u>At 20°C</u>      | <i>w/Y; UAS&gt;STOP&gt;TrpA1<sup>myc</sup>/+; R26E01-Gal4/+</i> (n=11 pairs)          | <i>w/Y; UAS&gt;STOP&gt;TrpA1<sup>myc</sup>/+; R26E01-Gal4/dsx<sup>FLP</sup></i> (n=9 pairs) |
|                     | <i>w/Y; +/+; dsx<sup>FLP</sup>/+</i> (n=9 pairs)                                      |                                                                                             |
| <u>At 29°C</u>      | <i>w/Y; UAS&gt;STOP&gt;TrpA1<sup>myc</sup>/+; R26E01-Gal4/+</i> (n=14 pairs)          | <i>w/Y; UAS&gt;STOP&gt;TrpA1<sup>myc</sup>/+; R26E01-Gal4/dsx<sup>FLP</sup></i> (n=7 pairs) |
|                     | <i>w/Y; +/+; dsx<sup>FLP</sup>/+</i> (n=6 pairs)                                      |                                                                                             |
| <b>Movie S1</b>     | Females: Wild type <i>Canton-S</i>                                                    |                                                                                             |
| <b>Movies S2-S5</b> | Females: <i>w;UAS-TrpA1/+; R26E01-Gal4/+</i>                                          |                                                                                             |
| <b>Movie S6</b>     | Males: <i>w/Y;UAS-TrpA1/+; R26E01-Gal4/+</i>                                          |                                                                                             |
| <b>Movie S7</b>     | Females: <i>w;UAS&gt;STOP&gt;TrpA1<sup>myc</sup>/+; R26E01-Gal4/dsx<sup>FLP</sup></i> |                                                                                             |
